# Supplementary material
Source: publisher figshare collection journal article supplement (https://frontiersin.figshare.com/ndownloader/files/30866983)
Supplement: Supplementary file [file 30866983]

| List names                        | number of elements | number of unique elements |
|-----------------------------------|--------------------|---------------------------|
| 12h/Ctrl                          | 43                 | 43                        |
| 24h/Ctrl                          | 84                 | 84                        |
| 48h/Ctrl                          | 52                 | 52                        |
| 72h/Ctrl                          | 97                 | 97                        |
| 1w/Ctrl                           | 49                 | 49                        |
| Overall number of unique elements |                    | 255                       |

| Names                                           | total | elements                                                                                                                                                      |
|-------------------------------------------------|-------|---------------------------------------------------------------------------------------------------------------------------------------------------------------|
| 12h/Ctrl, 24h/Ctrl, 48h/Ctrl, 72h/Ctrl, 1w/Ctrl | 1     | Alox5ap                                                                                                                                                       |
| 12h/Ctrl, 24h/Ctrl, 48h/Ctrl, 72h/Ctrl          | 2     | Knec1, Inpp5k                                                                                                                                                 |
| 24h/Ctrl, 48h/Ctrl, 72h/Ctrl, 1w/Ctrl           | 2     | Nqo1, Dcx                                                                                                                                                     |
| 12h/Ctrl, 24h/Ctrl, 48h/Ctrl                    | 1     | Sf3b5                                                                                                                                                         |
| 12h/Ctrl, 24h/Ctrl, 72h/Ctrl                    | 1     | Ddt                                                                                                                                                           |
| 12h/Ctrl, 48h/Ctrl, 72h/Ctrl                    | 1     | Rnf25                                                                                                                                                         |
| 12h/Ctrl, 48h/Ctrl, 1w/Ctrl                     | 1     | Isoc2b                                                                                                                                                        |
| 24h/Ctrl, 48h/Ctrl, 72h/Ctrl                    | 2     | Pcbp3, Hp                                                                                                                                                     |
| 24h/Ctrl, 72h/Ctrl, 1w/Ctrl                     | 1     | Gng13                                                                                                                                                         |
| 12h/Ctrl, 24h/Ctrl                              | 4     | Tenm3, Nucb2, Apoc3, Pltp                                                                                                                                     |
| 12h/Ctrl, 48h/Ctrl                              | 3     | Mt2, Samhd1, Vasp                                                                                                                                             |
| 12h/Ctrl, 72h/Ctrl                              | 6     | Htra1, Nipa1, Etnppl, Ypel5, Sparc, Tial1                                                                                                                     |
| 12h/Ctrl, 1w/Ctrl                               | 3     | Wfs1, Mrpl22, Serpina1e                                                                                                                                       |
| 24h/Ctrl, 48h/Ctrl                              | 3     | Rnaseh2a, Gstt1, Abhd17a                                                                                                                                      |
| 24h/Ctrl, 72h/Ctrl                              | 11    | Omp, S100a5, Nudt19, Rpl6, Gtf3c1, Cldn3, Rpl28, Rpl7, Lima1, Rpl2, Rpl24                                                                                     |
| 1w/Ctrl, 24h/Ctrl                               | 1     | Casp3                                                                                                                                                         |
| 48h/Ctrl, 72h/Ctrl                              | 5     | Lrba, Igsf3, Wdr18, Ufl1, Dgat1                                                                                                                               |
| 48h/Ctrl, 1w/Ctrl                               | 3     | Sez6, Shtn1, Inpp5b                                                                                                                                           |
| 72h/Ctrl, 1w/Ctrl                               | 1     | Pcp4l1                                                                                                                                                        |
| 12h/Ctrl                                        | 20    | Ccdc115, Fam173a, Rab11fip5, Lrrc75a, Acox1, Ddhd1, Pitpnm3, Krt76, Slc9a1, Clcc1, Nudt16l1, Slc35e1, Kcnt1, Mt1, Acot13, Abca5, Kif1b, Gusb, Atp12a, Khdrbs3 |

|          |    |                                                                                                                                                                                                                                                                                                                                                                                                                                                                       |
|----------|----|-----------------------------------------------------------------------------------------------------------------------------------------------------------------------------------------------------------------------------------------------------------------------------------------------------------------------------------------------------------------------------------------------------------------------------------------------------------------------|
| 24h/Ctrl | 55 | Tspan31, Sorbs3, Rpl18, Ttc39b, Rpl13, Spta1, Shisa6, Rps6, Hist1h1b, Rpl29, Nnt, Sh2d5, Gsg1l, Tmem151a, Tmem205, Rpl15, Ube2q1, Fam234b, Rpl7a, Myh6, Gnl3l, Gtf2i, Rpl34, Kng1, Islr2, Ddx50, Sdhc, Lzts3, Patj, Chtop, Mrpl13, Des, Gc, Gigyf1, Rem2, Fhit, Rpl13a, Mtus2, Glrb, Dnajc16, Grk6, Hist1h4a, Map4k3, Clns1a, Phactr1, Stag2, Prpf3, Nr3c1, Rpl36, Slc43a1, Eva1a, Lama5, Obscn, H1f0, Ptpre                                                          |
| 48h/Ctrl | 28 | Rnaset2b, Ntrk3, Dennd4b, Limk2, Tor1a, Usp20, F3, Dapk3, Smpdl3b, Th, Tnfaip8l3, Itga7, Lin7b, Celf4, Rnf31, Fn1, Efhd1, Camta1, Ftl1, Slc6a7, Rnf20, Clgn, Slc25a29, Fgd3, Pgbd5, Tspan2, C3, Maea                                                                                                                                                                                                                                                                  |
| 72h/Ctrl | 64 | Itih3, Syne2, Lyn, Sdf2, AspH, Sephs1, Jcad, Irf2bpl, Inpp5j, Flnc, Cbx3, Kiaa1109, Nucks1, Ccar1, Pcif1, Tusc5, Ddx17, Arap1, Acin1, Znf207, Lmcd1, Crybb1, Fmr1, Hdglf3, Cfdp1, Them6, F69, Fkbp5, Cpne7, Vim, Gnal, Myo6, Ass1, Trir, Serpinb1b, Tprn, Phospho2, Rragc, Eml2, Calb2, Kctd8, Snrpa, Clic1, Rgs3, Dek, Gtf2f1, Rhof, Ubash3b, Synpo2, Stag1, Dhhs13, Top1, Mtcl1, Dmd, Kctd12, Eif4enif1, Nosip, Pnck, Pnpla7, Khdrbs1, Rasa3, Rpl19, Lynx1, Fam110b |
| 1w/Ctrl  | 36 | Cd38, Slit1, Hebp2, Hcrt, Baiap3, Hspa12b, Serpina3k, Clic6, Prkci, Gar1, Ca14, Gpam, Cisd3, RbmX, Mcts1, Upp1, Wdr61, Ambra1, Ddx21, Scn3a, Otulin, Tra2b, Lamtor5, Eif2d, Fxyd7, Ppp1r2, R3hdm2, Fip1l1, Larp4b, Limk1, Pik3r2, Hist1h2ap, Cirbp, Dvl3, Ube2d2, Ccdc50                                                                                                                                                                                              |

| List names                        | number of elements | number of unique elements |
|-----------------------------------|--------------------|---------------------------|
| 12h/0h                            | 43                 | 43                        |
| 24h/12h                           | 64                 | 64                        |
| 48h/24h                           | 83                 | 83                        |
| 72h/48h                           | 94                 | 94                        |
| 1w/72h                            | 117                | 117                       |
| Overall number of unique elements |                    | 324                       |

| Names                            | total | elements  |
|----------------------------------|-------|-----------|
| 12h/0h, 1w/72h, 48h/24h, 72h/48h | 1     | Htra1     |
| 1w/72h, 24h/12h, 48h/24h         | 1     | Tmem151a  |
| 1w/72h, 24h/12h, 72h/48h         | 1     | Hpca      |
| 12h/0h, 1w/72h, 24h/12h          | 1     | Serpina1e |

|                          |    |                                                                                                                                                                                                                                                                                                                                                                                                                                             |
|--------------------------|----|---------------------------------------------------------------------------------------------------------------------------------------------------------------------------------------------------------------------------------------------------------------------------------------------------------------------------------------------------------------------------------------------------------------------------------------------|
| 1w/72h, 48h/24h, 72h/48h | 1  | Cpne7                                                                                                                                                                                                                                                                                                                                                                                                                                       |
| 12h/0h, 1w/72h, 72h/48h  | 1  | Isoc2b                                                                                                                                                                                                                                                                                                                                                                                                                                      |
| 24h/12h, 48h/24h         | 9  | Aff4, Slc17a6, Spata2l, Stum, H1f0, Serinc5, Fbxl4, Stag2, Eva1a                                                                                                                                                                                                                                                                                                                                                                            |
| 24h/12h, 72h/48h         | 1  | Synpo2                                                                                                                                                                                                                                                                                                                                                                                                                                      |
| 1w/72h, 24h/12h          | 1  | Serpina3k                                                                                                                                                                                                                                                                                                                                                                                                                                   |
| 12h/0h, 24h/12h          | 3  | Tenm3, Kif1b, Ccdc115                                                                                                                                                                                                                                                                                                                                                                                                                       |
| 48h/24h, 72h/48h         | 10 | Lsm14b, Rpl6, Cdc42ep1, Tubb6, Hp, C3, Rpl27a, Iqgap2, Des, Lgmn                                                                                                                                                                                                                                                                                                                                                                            |
| 1w/72h, 48h/24h          | 5  | Tf, Apoc1, Pzp, Upp1, Slc4a1                                                                                                                                                                                                                                                                                                                                                                                                                |
| 12h/0h, 48h/24h          | 1  | Pltp                                                                                                                                                                                                                                                                                                                                                                                                                                        |
| 1w/72h, 72h/48h          | 30 | Pcnp, Blvrb, Kiaa1109, Nfia, Ly6h, Cyp2d11, Ptpdc1, Crym, Slc6a7, Mtcl1, Pnck, Col6a2, Fam110b, Lyn, Ss18l1, Serpinh1, Vim, Rgs14, Slc38a3, Trir, Galc, Clic1, Ubash3b, Lmtk2, Ptk2b, Dgat1, Dvl3, Sbn01, Eif4enif1, Mtnd3                                                                                                                                                                                                                  |
| 12h/0h, 1w/72h           | 4  | Wfs1, Sf3b5, Nipa1, Etnppl                                                                                                                                                                                                                                                                                                                                                                                                                  |
| 24h/12h                  | 47 | Fat3, Ttc39b, Mcam, Spta1, Rgs20, Il18r1, Myh6, Apoa1, Synpo, Pafah1b3, Cldnd1, Glrb, Syngr1, Clns1a, Phactr1, Gjc3, Rap2a, Tp53rk, Pi4kb, Il6st, Rhbdd3, Ddx20, Amdhd2, Nmt2, Spns1, Actn2, Cyth3, Nrn1, Rtn4rl2, Kcnj10, Tns3, Rnaseh2a, Tbc1d17, Sub1, Ano8, Homer1, Gstt1, Hist1h4a, Tbl3, Prpf3, Kalrn, Obscn, Actn1, Lemd3, Iqgap1, F18, Epc1                                                                                         |
| 48h/24h                  | 55 | Rpl18, Rpl13, Slit3, Adcy3, Rai14, Znf512, Rpl29, Kcnip2, Jak1, Grik2, Dhrr7b, Mrps26, Islr2, Gjb1, Fhit, Rpl13a, Efhd1, Cacnb2, Mcrip2, Tsen34, Cuedc2, Uba52, Nr3c1, Dgkb, Cd2bp2, Tbc1d22a, Arhgef17, Rpl24, Gabrb3, Cfh, Rpl35a, Tor1a, Hist1h1d, Jcad, Myl9, Smpdl3b, Tmem205, Uap1, Th, Tnfaip8l3, Rpl7a, Gtf2i, Rpl34, P2ry12, Chtop, Gc, Rnf31, Mid1ip1, Rpl28, Cybc1, Rab15, Ppp1r1b, Sec61b, Rps23, Gprin3                        |
| 72h/48h                  | 49 | Ufc1, Slc35f1, Cd200, Crip2, Cacng2, Arap1, Acin1, Mboat2, Syt17, Ptpn, Gmpr, Sh3bp1, Necab2, Ddc, Eif4e2, Nyap2, Slc25a24, Nup214, Ppp1r16a, Mindy2, Ablim1, Bnip3, Cic, Rasa3, Rnaset2b, Tmem240, Dkc1, Sephs1, Pcif1, Tmem143, Dynlt1, Synj2bp, Phkb, Crybb1, Hdgfl3, Itga7, Srrt, Pon2, Ass1, Syt5, Dcaf5, Dgke, Rps8, Napepld, Lima1, Tmpo, Slc6a9, Fam210b, Rpl19                                                                     |
| 1w/72h                   | 71 | Gltp, Pcbp3, Ica1, Tusc5, Eif2s3y, Ndufaf7, Unc13c, Atg13, Adrbk2, Hsp90ab1, Abcf3, Haghl, Nemf, Sdhc, Eif1b, Tmed2, Irgq, Galm, Ahsg, Jam2, Ppp1r2, Plip, Rcor3, Bpgm, Srpk1, Fkbp4, Cdkn1b, Gaa, Itih3, Omp, Rgs17, Mettl3, Slit1, S100a5, Sdf2, Serpinc1, Cacnb1, Stk32c, Irf2bpl, Mib1, Clic6, Wasf2, Ddx17, Saraf, Mob1a, Ca1, Luc7l, Cygb, Stard10, Gnl3l, Arglu1, Sez6l2, Numb, Hba, Fez1, Hbb-b2, Tprn, Nudt12, Naaa, Fam20b, Npc2, |

|        |    |                                                                                                                                                                                                                                                 |
|--------|----|-------------------------------------------------------------------------------------------------------------------------------------------------------------------------------------------------------------------------------------------------|
|        |    | Fxyd7, Snrpa, F13a1, Dhrrs13, Apoa4, Tnfrsf6b, Gemin5, Ube2d2, Speg, Hspb1                                                                                                                                                                      |
| 12h/0h | 32 | Alox5ap, Rab11fip5, Acox1, Pitpnm3, Slc9a1, Nudt16l1, Kndc1, Abca5, Nucb2, Mt2, Gusb, Inpp5k, Samhd1, Ddt, Khdrbs3, Tial1, Rnf25, Fam173a, Lrrc75a, Ddhd1, Krt76, Clcc1, Slc35e1, Mrpl22, Kcnt1, Ypel5, Mt1, Sparc, Acot13, Apoc3, Atp12a, Vasp |
